# Supplementary material
Source: Springer Nature journal article supplement (https://www.springermedizin.de/resource/supplementary/12887_2013_881_MOESM1_ESM.pdf/9475960)
Supplement: MOESM1 [file 9475960]

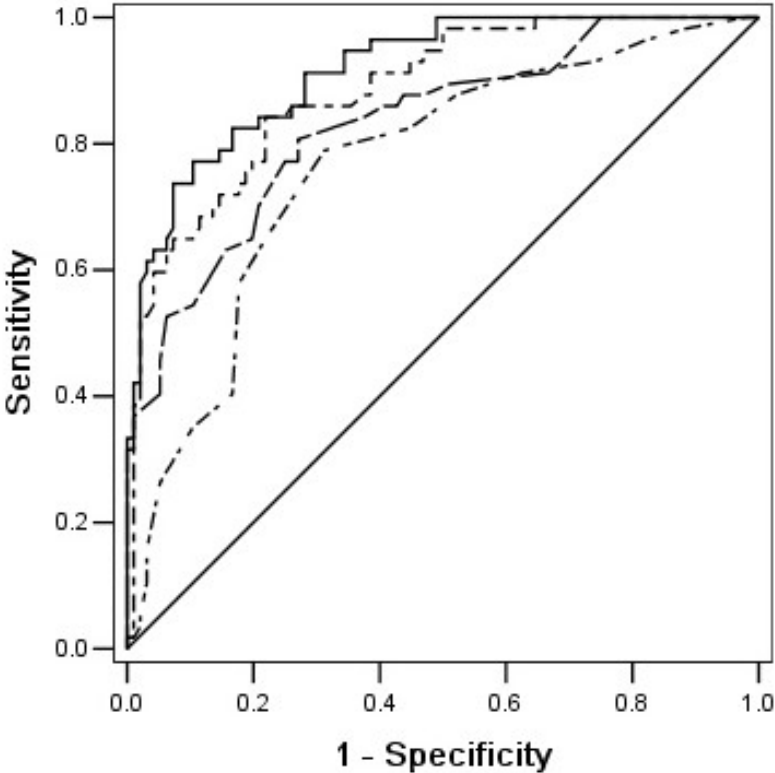

--- SNAP

— Gestational age

--- SNAP, combined with gestational age

— SNAP, combined with gestational age, surfactant, apnea, and patent ductus arteriosus
